# Supplementary material for: Biologically Synthesized Boron Oxide Nanoparticles Improve the Photosynthetic Performance and Yield in Potato Plants
Source: Research Square preprint supplement (doi:10.21203/rs.3.rs-5387288/v1), 2024-12-03
Supplement: Supplementary file 1 [file 7ff636f220e35e125d6a5b69.docx]

**Biologically Synthesized Boron Oxide Nanoparticles Improve the Photosynthetic Performance and Yield in Potato Plants**

SI 1: Effect of nano boron and borax on tomato plants growing in field under natural environmental conditions

| Treatment (µg/mL) | Shoot length (cm) | Branches | Leaf count | Root length (cm) | FW Shoot (g) | FW Root (g) | DW Shoot (g) | DW Root (g) |
| --- | --- | --- | --- | --- | --- | --- | --- | --- |
| UC | 41.8 ± 14.2 | 3.2 ± 1.8 | 13.4 ± 6.2 | 9.2 ± 2.4 | 62 ± 13.2 | 8.2 ± 1.3 | 12.6 ± 2.0 | 2.7 ± 0.4 |
| NB – 12 (I) | **80.7 ± 13.1** | **8.3 ± 1.2** | **22.4 ± 8.1** | **20.6 ± 4.2** | **106 ± 38.6** | **34.8 ± 9.6** | **16.4 ± 4.4** | **6.7 ± 1.5** |
| NB – 12 (I+II) | **76.0 ± 14.0** | **7.5 ± 1.1** | **21.6 ± 4.8** | **20.5 ± 3.5** | **111 ±53.0** | **29 ± 13.5** | **18.1 ± 6.2** | **6.0 ± 3.3** |
| NB – 50 (I) | **91.4 ± 12.2** | **7.7 ± 2.5** | **26.3 ± 5.5** | **19.6 ± 4.6** | **103 ± 43.0** | **29.6 ± 8.6** | **20.9 ± 4.5** | **6.2 ± 2.4** |
| NB – 50 (I+II) | **54.5 ± 12.5** | **7.0 ± 1.5** | **19.2 ± 7.8** | **16.5 ± 4.3** | **96 ± 68.8** | **24.5 ± 6.0** | **21.8 ± 10.7** | **4.5 ± 2.4** |
| NB – 250 (I) | **71.7 ± 4.8** | **6.3 ± 2.5** | **27.4 ± 6.4** | **19.4 ± 3.8** | **135 ± 76.6** | **28.5 ± 8.5** | **31.5 ± 14.0** | **6.8 ± 3.9** |
| NB – 250 (I+II) | **54.6 ± 5.4** | **5.7 ± 1.8** | **22.4 ± 8.5** | **13.6 ± 3.9** | **115 ± 73.8** | **29.8 ± 9.4** | **22.2 ± 7.2** | **7.2 ± 2.4** |
| NB – 1000 (I) | **63.7 ± 11.1** | **7.5 ± 2.7** | **28.5 ± 9.5** | **15.5 ± 0.8** | **172 ± 70.5** | **28 ± 3.5** | **32.5 ± 8.9** | **5.5 ± 2.6** |
| NB– 1000 (I+II) | **91.2 ± 9.9** | **8.6 ± 1.3** | **26.7 ± 9.3** | **17.6 ± 2.9** | **143 ± 78.2** | **21 ± 8.9** | **26.8 ± 9.7** | **6.3 ± 2.6** |
| NB – 4000 (I) | **66.8 ± 7.9** | **6.2 ± 2.0** | **26.9 ± 7.8** | **14.2 ± 2.4** | **101.25 ± 65.6** | **24.7 ± 12.7** | **27.7 ± 9.9** | **7.3 ± 2.5** |
| NB– 4000 (I+II) | **58.3 ± 7.4** | **6.7 ± 1.8** | **22.7 ± 5.6** | **14.0 ± 2.0** | **123 ± 51.2** | **12.5 ± 4.8** | **24.7 ± 8.8** | **4.6 ± 1.2** |
| BX – 12 (I) | 43.6 ± 10.2 | 2.4 ± 0.7 | 11.7 ± 2.5 | 7.7 ± 2.4 | 20.1 ± 4.7 | 12 ± 3.9 | 9.5 ± 2.6 | 2.7 ± 1.5 |
| BX – 12 (I+II) | **51.0 ± 9.4** | 3.4 ± 0.9 | 12 ± 2.6 | 6.5 ± 1.1 | **42.1 ± 18.0** | **15.8 ± 5.0** | 15.1 ± 6.3 | 3.2 ± 1.6 |
| BX – 50 (I) | 45.6 ± 24.2 | 4 ± 1.6 | 15.7 ± 5.5 | 8.9 ± 1.4 | **41.4 ± 26.7** | **15.1 ± 8.9** | 13.6 ± 7.0 | 2.5 ± 0.8 |
| BX – 50 (I+II) | **60.7 ± 15.4** | 4.7 ± 1.8 | 14.3 ± 3.3 | 8.9 ± 1.6 | **61.2 ± 21.7** | **18.0 ± 8.5** | 18.05 ± 4.2 | 3.5 ± 1.4 |
| BX – 250 (I) | **53.8 ± 10.5** | 4.7 ± 1.2 | 17.3 ± 3.4 | 9.6 ± 2.3 | **48 ± 32** | **16.8 ± 9.7** | 13.6 ± 6.8 | 3.8 ± 1.3 |
| BX – 250 (I+II) | **49.6 ± 9.7** | 4.4 ± 1.7 | 14.5 ± 3.3 | 9.8 ± 1.3 | **46.3 ± 26.2** | **15.8 ± 5.7** | 16.8 ± 3.8 | 3.7 ± 1.6 |
| BX – 1000 (I) | **49.5 ± 7.4** | 4.8 ± 1.4 | 19.8 ± 5.7 | 8.2 ± 1.4 | **79 ± 41.4** | **14.3 ± 3.5** | **23.6 ± 7.3** | 3.0 ± 0.8 |
| BX – 1000 (I+II) | 38.0 ± 6.3 | **6.7 ± 1.8** | **19.7 ± 7.2** | 7.6 ± 2.1 | **94.4 ± 53.6** | **15.3 ± 3.4** | **23.1 ± 7.5** | 3.8 ± 1.5 |
| BX – 4000 (I) | 33.6 ± 7.5 | **6.5 ± 2.5** | **19.1 ± 5.5** | 5.7 ± 1.3 | **84 ± 42.4** | **15.5 ± 3.9** | **24.4 ± 5.6** | 3.8 ± 1.1 |
| BX – 4000 (I+II) | 35.8 ± 6.2 | **5.8 ± 2.2** | **21.3 ± 3.5** | 7.5 ± 1.3 | **58.1 ± 30.4** | 9.7 ± 1.7 | **23.3 ± 7.2** | 3.8 ± 3.1 |

**SI 2. Zeta Potential of nano boron**

**
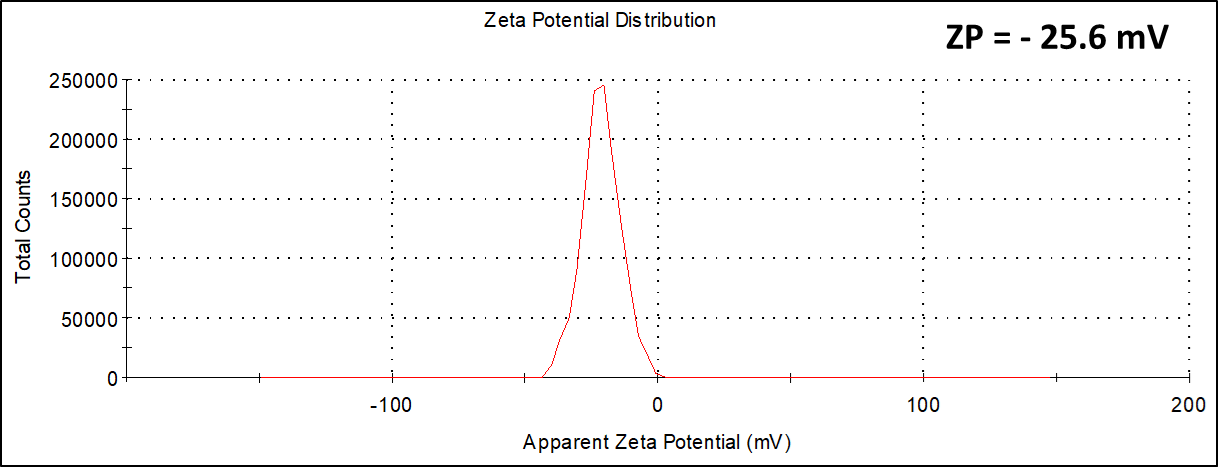
**SI2: Zeta potential of nano boron showing moderate stability of nano boron

**SI 3. The 2θ values for nano boron and associated functional groups**

| Nano boron 2Ɵ° | Previously reported 2Ɵ° values for boron-based nanoparticles | hkl plane | Corresponding functional group | Ref. |
| --- | --- | --- | --- | --- |
| 28° | 27.3°, 27.7°, 28° | (-3 1 1); (-1 3 1) | Boron oxide | 1-4 |
| 32° | 32° | (003) and (310) | Boron oxide | 2 |
| 45° | 45° | (510) | Boron oxide | 1 |
| 56° | 56° | (620) | Boron oxide | 1 |


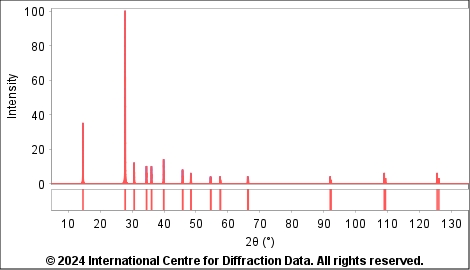


JCPDS: 06-0297

XRD spectrum of JCPDS 06-0297

**SI 4. Raman spectroscopy of nano boron**

| Observed Raman peak in nano boron (cm-1) | Reported Raman peaks for boron-based NPs (cm-1) | | Corresponding functional group | Ref. |
| --- | --- | --- | --- | --- |
| 348 | 362 | Stretching modes of BO4 | | 5, 6 |
| 522 | 521.6 | Pentaborate ion [B5O6 (OH)4]- | | 7 |
| 575 | 575.4 | Tetraborate species [B4O5 (OH)]-2 | | 7 |
| 760 | 764.3 | Diborate species [B2O (OH)5]- | | 7 |
| 948 | 945.8 | Stretching mode of orthoborate anions (BO3-3) | | 8 |

**SI 5. FTIR wavenumber of nano boron and corresponding functional groups**

| Nano boron | Nano boron peak broad range | Literature | Functional group | Ref. |
| --- | --- | --- | --- | --- |
| 458 | 410 – 500 (numerous peaks) | 454, 500 | O-B-O ring bending | 3 |
| 400 – 650 | B–O–B bending vibrations and borate rings deformation | 9 |
| 524 | 511 - 530 | 600 – 800 | B-O-B bending in borate network | 9, 10 |
| 617 | 590 - 650 | 600- 800 | Bending vibrations of bridging oxygen B-O-B between BO3 and BO4 | 11-13 |
| 697 | 650 – 760 (C) | 720 – 760 | Transverse-optical longitudinal-optical (TO-LO) splits of BO3 | 14, 15 |
| 845 | 820 – 885 (B) | 800 – 1200 | B-O stretching in BO4, BO3 | 14 |
| 944 | 920 – 970 (B) | 944 | Symmetric stretch of BO in BO3 | 3 |
| 996 | 975 – 1115 (B) | 800-1200, | B-O stretching in BO4 | 14 |
| 995 | Presence of BO4 structure |
| 1330 | 1245 – 1455 (A) | 1432, 1344, 1258 | Asymmetric stretch of B-O bond in BO3 | 3 |
| 1200 – 1600 | Asymmetric stretch of B-O bond of trigonal BO3 | 9 |
| 1645 | 1570 - 1700 | 1545 – 1551, 1600-1690 | Amide I and II; carbonyl peptide C=O stretching | 14, 16, 17 |
| 1652 | H-O-H bending | 3 |

**SI 6. Dose dependent effect of nano boron and bulk boron in different regression model predicting shoot length and number of leaves**

| Factor | Shoot length = a + b*S | |
| --- | --- | --- |
|  | *a* | *b* |
| NB T1 | 14.32 (2.11*10-15) | 0.11 (2.77*10-5) |
| NB T2 | 14.202 (< 2*10-16) | 0.061 (0.0034) |
| BB T1 | 2.95 (0.0327) | 0.113 (3.04*10-6) |
| BB T2 | 6.54 (5.95*10-8) | 0.061 (0.0014) |
| UC | 1.722 (0.0378) | 0.16 (< 2*10-16) |
|  |  |  |
| Factor | Number of leaves = a + b*S | |
|  | *a* | *b* |
| NB T1 | 5.76 (5.42*10-5) | 0.242 (<2*10-16) |
| NB T2 | 7.724 (0.00013) | 0.200 (1.79*10-8) |
| BB T1 | 9.283 (1.78*10-8) | 0.066 (0.0094) |
| BB T2 | 11.881 (1.81*10-13) | 0.013 (0.562) |
| UC | 8.22 (3.38*10-16) | 0.087 (4.57*10-8) |
|  |  |  |
| Factor | Number of branches = a + b*S | |
|  | *a* | *b* |
| NB T1 | 1.08 (0.168) | 0.118 (2.08*10-14) |
| NB T2 | 0.65 (0.349) | 0.118 (<2*10-16) |
| BB T1 | 2.111 (0.0003) | 0.032 (0.0008) |
| BB T2 | 3.34 (3.12*10-13) | 0.015 (0.0209) |
| UC | 8.22 (3.38*10-16) | 0.087 (4.57*10-8) |

Data were fitted to linear function to find relationship between shoot length, number of leaves with each nanomaterial at respective test concentration. Significance level within parentheses indicates the probability of coefficient (*a* and *b*) being different from zero.

**SI 7. ANOVA for shoot length**

|  | df | sum squares | mean sum squares | *F*-value | *P*-value |
| --- | --- | --- | --- | --- | --- |
| Nutrient | 4 | 4971 | 1242.8 | 301.2 | < 2*10-16 |
| Residuals | 175 | 722 | 4.1 |  |  |

**SI 8. Multiple Comparisons of Means: Tukey Contrasts for shoot length**

|  | Estimate | Std. error | t- value | *P-*value |
| --- | --- | --- | --- | --- |
| BB T2 - BB T1 | -0.4900 | 0.5245 | -0.934 | **0.881954** |
| NB T1 - BB T1 | 13.3000 | 0.5245 | 25.360 | < 1*10-4 |
| NB T2 - BB T1 | 9.9567 | 0.5245 | 18.985 | < 1*10-4 |
| UC - BB T1 | 1.9150 | 0.4542 | 4.216 | 0.000369 |
| NB T1 - BB T2 | 13.7900 | 0.5245 | 26.294 | < 1*10-4 |
| NB T2 - BB T2 | 10.4467 | 0.5245 | 19.919 | < 1*10-4 |
| UC - BB T2 | 2.4050 | 0.4542 | 5.295 | < 1*10-4 |
| NB T2 - NB T1 | -3.3433 | 0.5245 | -6.375 | < 1*10-4 |
| UC - NB T1 | -11.3850 | 0.4542 | -25.067 | < 1*10-4 |
| UC - NB T2 | -8.0417 | 0.4542 | -17.705 | < 1*10-4 |

The data showing P < 0.001 ‘***’ denote a high level of statistical significance. (Adjusted p values reported -- single-step method).

**SI 9.ANOVA for root length**

|  | df | sum squares | mean sum squares | *F*-value | *P*-value |
| --- | --- | --- | --- | --- | --- |
| Nutrient | 4 | 3023.7 | 755.9 | 269.1 | < 2*10-16 |
| Residuals | 175 | 491.6 | 2.8 |  |  |

**SI 10. Multiple Comparisons of Means: Tukey Contrasts for root length**

|  | Estimate | Std. error | t- value | *P-*value |
| --- | --- | --- | --- | --- |
| BB T2 - BB T1 | -0.5300 | 0.4328 | -1.225 | **0.734751** |
| NB T1 - BB T1 | 11.3833 | 0.4328 | 26.304 | < 1*10-4 |
| NB T2 - BB T1 | 5.3833 | 0.4328 | 12.440 | < 1*10-4 |
| UC - BB T1 | 1.6317 | 0.3748 | 4.354 | 0.000238 |
| NB T1 - BB T2 | 11.9133 | 0.4328 | 27.529 | < 1*10-4 |
| NB T2 - BB T2 | 5.9133 | 0.4328 | 5.768 | < 1*10-4 |
| UC - BB T2 | 2.1617 | 0.3748 | 5.768 | < 1*10-4 |
| NB T2 - NB T1 | -6.0000 | 0.4328 | -13.865 | < 1*10-4 |
| UC - NB T1 | -9.7517 | 0.3748 | -26.020 | < 1*10-4 |
| UC - NB T2 | -3.7517 | 0.3748 | -10.010 | < 1*10-4 |

The data showing P < 0.001 ‘***’ denotes a high level of statistical significance. (Adjusted p values reported -- single-step method)

**SI 11. ANOVA for fresh weight shoot**

|  | df | sum squares | mean sum squares | *F*-value | *P*-value |
| --- | --- | --- | --- | --- | --- |
| Nutrient | 4 | 306782 | 76695 | 65.65 | < 2*10-16 |
| Residuals | 175 | 204452 | 1168 |  |  |

**SI 12. Multiple Comparisons of Means: Tukey Contrasts for fresh weight shoot**

|  | Estimate | Std. error | t- value | *P-*value |
| --- | --- | --- | --- | --- |
| BB T2 - BB T1 | -21.664 | 8.825 | -2.455 | **0.104864** |
| NB T1 - BB T1 | 89.880 | 8.825 | 5.696 | < 1*10-4 |
| NB T2 - BB T1 | 50.266 | 8.825 | 5.696 | < 1*10-4 |
| UC - BB T1 | -15.054 | 7.643 | -1.970 | **0.282807** |
| NB T1 - BB T2 | 111.544 | 8.825 | 12.639 | < 1*10-4 |
| NB T2 - BB T2 | 71.930 | 8.825 | 8.150 | < 1*10-4 |
| UC - BB T2 | 6.609 | 7.643 | 0.865 | **0.908352** |
| NB T2 - NB T1 | -39.614 | 8.825 | -4.489 | 0.000133 |
| UC - NB T1 | -104.935 | 7.643 | -13.730 | < 1*10-4 |
| UC - NB T2 | -65.320 | 7.643 | -8.546 | < 1*10-4 |

The data showing P < 0.001 ‘***’ denotes a high level of statistical significance. (Adjusted p values reported -- single-step method)

**SI 13. ANOVA for fresh weight root**

|  | df | sum squares | mean sum squares | *F*-value | *P*-value |
| --- | --- | --- | --- | --- | --- |
| Nutrient | 4 | 140.47 | 35.12 | 91.26 | < 2*10-16 |
| Residuals | 175 | 67.34 | 0.38 |  |  |

**SI 14. Multiple Comparisons of Means: Tukey Contrasts for fresh weight root**

|  | Estimate | Std. error | t- value | *P-*value |
| --- | --- | --- | --- | --- |
| BB T2 - BB T1 | 0.0770 | 0.1602 | 0.481 | **0.9889** |
| NB T1 - BB T1 | 2.0123 | 0.1602 | 12.564 | < 0.001 |
| NB T2 - BB T1 | 1.5223 | 0.1602 | 9.505 | < 0.001 |
| UC - BB T1 | -0.1823 | 0.1387 | -1.315 | **0.6801** |
| NB T1 - BB T2 | 1.9353 | 0.1602 | 12.084 | < 0.001 |
| NB T2 - BB T2 | 1.4453 | 0.1602 | 9.024 | < 0.001 |
| UC - BB T2 | -0.2593 | 0.1387 | -1.870 | **0.3350** |
| NB T2 - NB T1 | -0.4900 | 0.1602 | -3.059 | **0.0211** |
| UC - NB T1 | -2.1947 | 0.1387 | -15.823 | < 0.001 |
| UC - NB T2 | -1.7047 | 0.1387 | -12.290 | < 0.001 |

The data showing P < 0.001 ‘***’ denote a high level of statistical significance and P ≥ 0.05 are not statistically significant. (Adjusted p values reported - single-step method)

**SI 15. ANOVA for number of tubers**

|  | df | sum squares | mean sum squares | *F*-value | *P*-value |
| --- | --- | --- | --- | --- | --- |
| Nutrient | 4 | 1597.3 | 399.3 | 71.35 | < 2*10-16 |
| Residuals | 175 | 979.5 | 5.6 |  |  |

**SI 16. Multiple Comparisons of Means: Tukey Contrasts for number of tubers**

|  | Estimate | Std. error | t- value | *P-*value |
| --- | --- | --- | --- | --- |
| BB T2 - BB T1 | -2.3667 | 0.6108 | -3.874 | 0.00138 |
| NB T1 - BB T1 | 4.3000 | 0.6108 | 7.040 | < 0.001 |
| NB T2 - BB T1 | 5.2667 | 0.6108 | 8.622 | < 0.001 |
| UC - BB T1 | - 1.4833 | 0.5290 | -2.804 | 0.04354 |
| NB T1 - BB T2 | 6.6667 | 0.6108 | 10.914 | < 0.001 |
| NB T2 - BB T2 | 7.6333 | 0.6108 | 12.496 | < 0.001 |
| UC - BB T2 | 0.8833 | 0.5290 | 1.670 | **0.45246** |
| NB T2 - NB T1 | 0.9667 | 0.6108 | 1.583 | **0.50775** |
| UC - NB T1 | -5.7833 | 0.5290 | -10.933 | < 0.001 |
| UC - NB T2 | -6.7500 | 0.6108 | -12.760 | < 0.001 |

The data showing P < 0.001 ‘***’ denote a high level of statistical significance and P ≥ 0.05 are not statistically significant. (Adjusted p values reported -- single-step method)

**SI 17. ANOVA for fresh weight of tubers**

|  | df | sum squares | mean sum squares | *F*-value | *P*-value |
| --- | --- | --- | --- | --- | --- |
| Nutrient | 4 | 366614 | 91653 | 75.18 | < 2*10-16 |
| Residuals | 175 | 213344 | 1219 |  |  |

**SI 18. Multiple Comparisons of Means: Tukey Contrasts for fresh weight of tubers**

|  | Estimate | Std. error | t- value | *P-*value |
| --- | --- | --- | --- | --- |
| BB T2 - BB T1 | -26.066 | 9.015 | -2.891 | 0.0342 |
| NB T1 - BB T1 | 95.306 | 9.015 | 10.572 | < 0.001 |
| NB T2 - BB T1 | 20.244 | 9.015 | 2.246 | 0.1664 |
| UC - BB T1 | -32.741 | 7.807 | -4.194 | < 0.001 |
| NB T1 - BB T2 | 121.372 | 9.015 | 13.463 | < 0.001 |
| NB T2 - BB T2 | 46.310 | 9.015 | 5.137 | < 0.001 |
| UC - BB T2 | -6.675 | 7.807 | -0.855 | **0.9118** |
| NB T2 - NB T1 | -75.062 | 9.015 | -8.326 | < 0.001 |
| UC - NB T1 | -128.047 | 7.807 | -16.401 | < 0.001 |
| UC - NB T2 | -52.985 | 7.807 | -6.787 | < 0.001 |

The data showing P < 0.001 ‘***’ denote a high level of statistical significance and P ≥ 0.05 are not statistically significant. (Adjusted p values reported -- single-step method)

**SI 18: Pictures comparing effect of nano boron and borax on growth and productivity of potato plants**


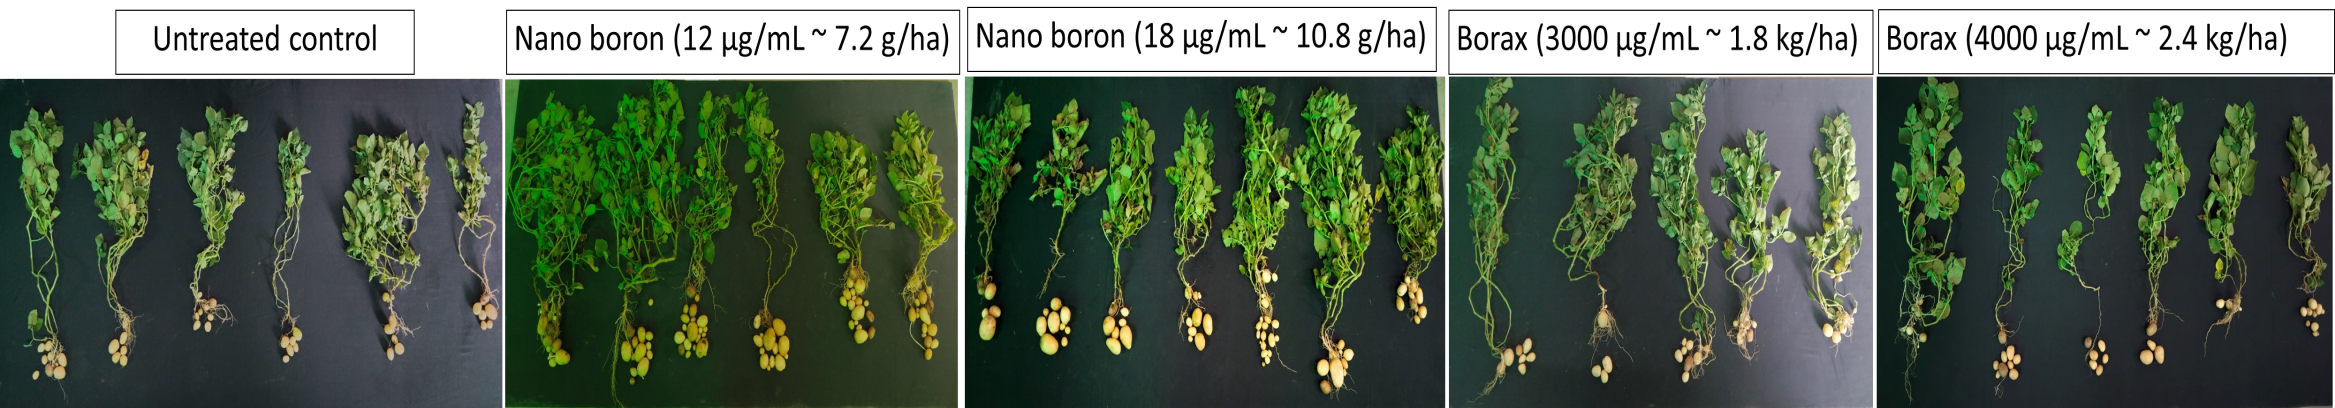
SI 18: Comparative effects of nano boron and borax on potato plant growth and productivity growing in field under naturalconditions.

**SI 19. Agronomic and yield parameters of potato plants after harvesting (Field study)**

| Nutrient | Shoot length (cm) | Root length (cm) | FW Shoot (g) | FW Root (g) |
| --- | --- | --- | --- | --- |
| NB T1 | 25 to 31.5 ± 1.99 | 9 to 20 ± 2.94 | 72.08 to 293.08 ± 63.78 | 2.4 to 4.2 ± 0.64 |
| NB T2 | 21 to 29 ± 2.29 | 6 to 13 ± 1.90 | 30.35 to 175.99 ± 42.42 | 1.9 to 4 ± 0.52 |
| BB T1 | 14 to 17 ± 1.20 | 2 to 5.6 ± 0.95 | 21.92 to 138.14 ± 22.34 | 0.45 to 2.35 ± 0.64 |
| BB T2 | 10 to 17 ± 1.63 | 2 to 4 ± 0.72 | 12.98 to 91.02 ± 19.49 | 0.42 to 3.2 ± 0.75 |
| UC | 14 to 21 ± 2.37 | 3.4 to 7.3 ± 1.25 | 21.92 to 87.45 ± 12.20 | 0.43 to 2.4 ± 0.53 |
|  |  |  |  |  |
| Nutrient | **No. of tubers** | **FW of tubers (g)** | **Tuber length (cm)** | **Tuber diameter (cm)** |
| NB T1 | 7 to 17 ± 2.94 | 79.75 to 388.37 ± 55.53 | 0.77 to 3.12 ± 0.55 | 0.849 to 2.57 ± 0.48 |
| NB T2 | 7 to 23 ± 4.07 | 44.09 to 184.73 ± 39.20 | 1.46 to 4.46 ± 0.68 | 1.075 to 2.67 ± 0.50 |
| BB T1 | 4 to 11 ± 1.91 | 15 to 167.12 ± 44.05 | 0.29 to 1.16 ± 0.33 | 0.416 to 1.47 ± 0.32 |
| BB T2 | 3 to 7 ± 1.56 | 11.11 to 97.66 ± 22.45 | 0.27 to 1.05 ± 0.21 | 0.276 to 0.76 ± 0.16 |
| UC | 3 to 7 ± 1.07 | 26.81 to 67.06 ± 11.95 | 0.21 to 0.61 ± 0.103 | 0.298 to 0.56 ± 0.09 |

*Abbreviations*: UC: Untreated control; FW_S: Fresh weight of shoot; FW_R: Fresh weight of root; g: grams; cm: centimeter; TL: tuber length; tuber diameter: TD

## SI 20: Co-relation among Potato Growth Parameters

Among all the parameters of plant growth and productivity (shoot length, root length, number of tubers, tuber length, tuber diameter, fresh weight of shoot, root and tuber), the association of shoot length with root length and tuber length with tuber diameter showing the greatest positive correlation 0.87 (r = 0.87, P < 0.001). It indicates that shoot length- root length and tuber length-diameter have high probability to fluctuate in relation to each other. Second, the matrix indicates that shoot length is highly co-related with tuber length or diameter (r = 0.73, P < 0.001). This is followed by co-relation of shoot length with fresh weight (FW) of shoot and root length with FW of root (r = 0.70, P < 0.001). Similar to these findings, previous studies highlighted the beneficial effects of boron on tuber formation and differentiation, indicating that improved vegetative growth correlates with higher tuber yields.18

**References**

(1) Yang, X.; Wu, N.; Miao, Y.; Li, H. Modification effects of B2O3 on the structure and catalytic activity of WO3-UiO-66 catalyst. *Nanomaterials* **2018**, *8* (10), 781. DOI: 10.3390/nano8100781

(2) Tran, B. H.; Tieu, K.; Wan, S.; Zhu, H.; Cui, S.; Wang, L. Understanding the tribological impacts of alkali element on lubrication of binary borate melt. *RSC advances* **2018**, *8* (51), 28847-28860. DOI: 10.1039/c8ra04658a

(3) Ekimov, E.; Sadykov, R.; Gromnitskaya, E.; Kondrin, M.; Mel’nik, N. Physical and mechanical properties of dense materials produced by hot isostatic pressing of amorphous boron. *Inorganic materials* **2006**, *42* (5), 479-483. DOI: 10.1134/S0020168506050050

(4) Zhang, Y.; Wang, Y.; Han, C.; Jia, S.; Zhou, S.; Zang, J. Tungsten-coated nano-boron carbide as a non-noble metal bifunctional electrocatalyst for oxygen evolution and hydrogen evolution reactions in alkaline media. *Nanoscale* **2017**, *9* (48), 19176-19182. DOI: 10.1039/C7NR08092A

(5) Kaur, P.; Kaur, A.; Singh, S.; Singh, L. Investigation on structural and thermoluminescence properties of Ho3+ doped SrB4O7 phosphor for dosimetry applications. *Journal of Molecular Structure* **2022**, *1248*, 131500. DOI: 10.1016/j.molstruc.2021.131500

(6) Szymborska-Małek, K.; Ptak, M.; Tomaszewski, P.; Majchrowski, A. Raman and IR spectroscopic study of a nonlinear optical crystal, La2CaB10O19. *Vibrational Spectroscopy* **2016**, *82*, 53-59. DOI: 10.1016/j.vibspec.2015.12.00

(7) Applegarth, L. M.; Pye, C. C.; Cox, J. S.; Tremaine, P. R. Raman spectroscopic and ab initio investigation of aqueous boric acid, borate, and polyborate speciation from 25 to 80° C. *Industrial & Engineering Chemistry Research* **2017**, *56* (47), 13983-13996. DOI: 10.1021/acs.iecr.7b03316

(8) Osipov, A. A.; Osipova, L. M.; Hruška, B.; Osipov, A. A.; Liška, M. FTIR and Raman spectroscopy studies of ZnO-doped BaO⋅ 2B2O3 glass matrix. *Vibrational Spectroscopy* **2019**, *103*, 102921. DOI: ARTN10292110.1016/j.vibspec.2019.05.003

(9) Pisarski, W. A.; Pisarska, J.; Ryba-Romanowski, W. Structural role of rare earth ions in lead borate glasses evidenced by infrared spectroscopy: BO3↔ BO4 conversion. *Journal of molecular structure* **2005**, *744*, 515-520. DOI: 10.1016/j.molstruc.2005.01.022

(10) Ahlawat, J.; Pawaria, S.; Deopa, N.; Dahiya, S.; Punia, R.; Maan, A. Structural and optical characterization of IR transparent sodium-modified zinc borate oxide glasses. *Applied Physics A* **2022**, *128* (10), 923. DOI: ARTN92310.1007/s00339-022-05997-w

(11) Ramachandran, R.; Jung, D.; Bernier, N. A.; Logan, J. K.; Waddington, M. A.; Spokoyny, A. M. Sonochemical synthesis of small boron oxide nanoparticles. *Inorganic chemistry* **2018**, *57* (14), 8037-8041. DOI: 10.1021/acs.inorgchem.8b01189

(12) Pfister, A.; Zhang, G.; Zareno, J.; Horwitz, A. F.; Fraser, C. L. Boron polylactide nanoparticles exhibiting fluorescence and phosphorescence in aqueous medium. *ACS nano* **2008**, *2* (6), 1252-1258. DOI: 10.1021/nn7003525

(13) Suryavanshi, U.; Balasubramanian, V. V.; Lakhi, K. S.; Mane, G. P.; Ariga, K.; Choy, J.-H.; Park, D.-H.; Al-Enizi, A. M.; Vinu, A. Mesoporous BN and BCN nanocages with high surface area and spherical morphology. *Physical Chemistry Chemical Physics* **2014**, *16* (43), 23554-23557. DOI: 10.1039/c4cp04210g

(14) De Meutter, J.; Goormaghtigh, E. Evaluation of protein secondary structure from FTIR spectra improved after partial deuteration. *European Biophysics Journal* **2021**, *50* (3-4), 613-628. DOI: 10.1007/s00249-021-01502-y

(15) Lee, E.-S.; Kang, J.-G.; Kang, M.-K.; Kim, K.-H.; Park, S.-T.; Kim, Y. S.; Kim, I.; Kim, S.-D.; Bae, J.-Y. High thermal conductivity of boron nitride filled epoxy composites prepared by tin solder nanoparticle decoration. *Composites Part B: Engineering* **2021**, *225*, 109264. DOI: ARTN10926410.1016/j.compositesb.2021.109264

(16) Vorokh, A. S. Scherrer formula: estimation of error in determining small nanoparticle size. *Nanosystems: Physics, Chemistry, Mathematics* **2018**, *9* (3), 364-369. DOI: 10.17586/2220-8054-2018-9-3-364-369

(17) Yogamalar, R.; Srinivasan, R.; Vinu, A.; Ariga, K.; Bose, A. C. X-ray peak broadening analysis in ZnO nanoparticles. *Solid State Communications* **2009**, *149* (43-44), 1919-1923. DOI: 10.1016/j.ssc.2009.07.043

(18) Pregno, L.; Armour, J. Boron deficiency and toxicity in potato cv. Sebago on an oxisol of the Atherton Tablelands, North Queensland. *Australian Journal of Experimental Agriculture* **1992**, *32* (2), 251-253. DOI: 10.1071/Ea9920251
